# Supplementary material
Source: MDPI journal article supplement (https://www.mdpi.com/2073-4433/15/1/102)
Supplement: s1 [file s1]

# Supplementary Materials: Assessment of Atmospheric Pollution by Selected Elements and PAHs during 12-Month Active Biomonitoring of Terrestrial Mosses

Małgorzata Rajfur <sup>1,\*</sup>, Anca-Iulia Stoica <sup>2</sup>, Paweł Świsłowski <sup>1</sup>, Wolfgang Stach <sup>2</sup>, Falko Ziegenbalg <sup>2</sup> and Eva Maria Mattausch <sup>2</sup>

**Table S1.** Average elemental concentrations in mosses during the one-year experiment- relative values [µg/g].

| Pl | Li    | Al.  | Se    | Sr   | Mo    | Cd    | Ba   | Pb   | Cr   | Mn   | Fe   | Ni   | Cu   | Zn   | As    | Co    |
|----|-------|------|-------|------|-------|-------|------|------|------|------|------|------|------|------|-------|-------|
| 0  | 0.655 | 869  | 0.679 | 12.4 | 0.414 | 0.961 | 42.1 | 11.1 | 2.05 | 461  | 698  | 2.74 | 22.3 | 116  | 0.478 | 0.447 |
| 1  | n.d.  | n.d. | 0.04  | 0.10 | 4.04  | 0.62  | n.d. | 1.13 | 0.01 | n.d. | 50.1 | n.d. | 3.01 | 4.68 | n.d.  | n.d.  |
| 2  | n.d.  | n.d. | 0.16  | 2.08 | n.d.  | 0.09  | n.d. | 2.64 | n.d. | n.d. | n.d. | 19.8 | 1.45 | 15.9 | 0.03  | 0.07  |
| 3  | 0.21  | n.d. | 0.24  | 2.39 | 2.98  | 0.27  | n.d. | 5.43 | 0.01 | n.d. | 134  | n.d. | 3.49 | 32.4 | 0.24  | 0.11  |
| 4  | 1.04  | 9.71 | 0.42  | 5.37 | 1.09  | 0.45  | 6.14 | 10.0 | 0.69 | n.d. | 207  | 0.23 | 11.4 | 51.1 | 0.45  | 0.22  |
| 5  | 0.28  | n.d. | 0.42  | 5.86 | 0.20  | 0.50  | 5.50 | 10.5 | 0.79 | n.d. | 161  | 0.23 | 6.24 | 42.7 | 0.44  | 0.20  |
| 6  | 0.34  | 119  | 0.73  | 1.93 | 0.30  | 0.74  | 20.2 | 14.0 | 0.93 | n.d. | 256  | 0.26 | 14.9 | 61.1 | 0.53  | 0.28  |
| 7  | 0.47  | 408  | 0.76  | 4.99 | 0.40  | 1.07  | 56.3 | 22.3 | 1.28 | n.d. | 633  | 0.55 | 5.69 | 83.0 | 0.42  | 0.43  |
| 8  | 0.67  | 678  | 0.86  | 11.4 | 2.06  | 1.05  | 53.0 | 22.7 | 1.71 | n.d. | 897  | 0.74 | 11.7 | 122  | 0.63  | 0.52  |
| 9  | 0.78  | 1050 | 0.84  | 8.04 | 0.52  | 1.04  | 69.0 | 25.2 | 2.02 | n.d. | 1318 | 0.94 | 11.3 | 136  | 0.62  | 0.62  |
| 10 | 1.13  | 1334 | 0.93  | 9.50 | 0.63  | 0.90  | 79.1 | 24.9 | 2.47 | n.d. | 1441 | 1.08 | 5.65 | 259  | 0.50  | 0.66  |
| 11 | 2.02  | 1528 | 1.07  | 28.7 | 0.57  | 1.17  | 145  | 33.0 | 3.03 | n.d. | 1916 | 1.67 | 9.70 | 225  | 0.73  | 0.94  |
| 12 | 1.47  | 1629 | 1.12  | 11.8 | 0.53  | 1.16  | 132  | 30.7 | 3.17 | n.d. | 1914 | 1.84 | 9.59 | 204  | 0.74  | 0.92  |
|    |       |      |       |      |       |       |      |      |      |      |      |      |      |      |       |       |
| Sp | Li    | Al.  | Se    | Sr   | Mo    | Cd    | Ba   | Pb   | Cr   | Mn   | Fe   | Ni   | Cu   | Zn   | As    | Co    |
| 0  | 0.42  | 896  | 0.72  | 20.9 | 0.57  | 1.07  | 69.0 | 8.50 | 1.52 | 273  | 481  | 2.00 | 9.44 | 109  | 0.37  | 0.49  |
| 1  | 0.04  | 21.2 | 0.11  | 6.05 | 0.10  | 0.14  | 9.78 | 1.69 | 0.26 | 9.61 | 11.5 | 0.86 | 0.10 | 11.8 | 0.04  | 0.10  |
| 2  | 0.20  | n.d. | 0.15  | 9.23 | 0.19  | 0.31  | 0.71 | 2.28 | n.d. | 47.9 | 24.0 | 0.33 | 0.44 | 19.9 | 0.06  | 0.14  |
| 3  | 0.44  | 13.5 | 0.27  | 12.0 | 0.07  | 0.39  | 5.55 | 5.05 | 0.18 | 46.0 | 146  | 0.43 | 3.76 | 37.6 | 0.37  | 0.22  |

|    |       |       |       |      |      |       |      |      |      |      |      |      |      |      |       |       |
|----|-------|-------|-------|------|------|-------|------|------|------|------|------|------|------|------|-------|-------|
| 4  | 0.94  | 172   | 0.38  | 16.0 | 0.12 | 0.54  | 14.3 | 7.98 | 0.52 | 42.7 | 192  | 0.83 | 10.5 | 53.9 | 0.50  | 0.28  |
| 5  | 0.65  | 282   | 0.42  | 21.8 | 1.17 | 0.69  | n.d. | 10.5 | 0.93 | 36.0 | 299  | 0.87 | 8.97 | 95.9 | 0.57  | 0.38  |
| 6  | 0.54  | 223   | 0.64  | 4.56 | 0.09 | 0.55  | 38.0 | 7.37 | 0.73 | 36.7 | 232  | 0.63 | 3.88 | 83.7 | 0.52  | 0.25  |
| 7  | 0.69  | 512   | 0.80  | 19.6 | 0.50 | 1.00  | 73.2 | 17.6 | 1.50 | 63.7 | 742  | 1.66 | 24.5 | 95.9 | 0.58  | 0.52  |
| 8  | 1.10  | 556   | 0.91  | 22.3 | 0.32 | 0.99  | 76.2 | 16.2 | 1.56 | 71.6 | 711  | 1.27 | 8.30 | 99.1 | 0.67  | 0.55  |
| 9  | 0.92  | 681   | 0.85  | 15.0 | 0.28 | 0.88  | 86.8 | 18.4 | 1.84 | 78.4 | 1040 | 1.44 | 7.41 | 98.1 | 0.66  | 0.59  |
| 10 | 1.26  | 1032  | 0.80  | 18.0 | 0.26 | 0.89  | 102  | 14.6 | 1.62 | 109  | 1047 | 1.49 | 6.86 | 204  | 0.56  | 0.59  |
|    |       |       |       |      |      |       |      |      |      |      |      |      |      |      |       |       |
| Di | Li    | Al.   | Se    | Sr   | Mo   | Cd    | Ba   | Pb   | Cr   | Mn   | Fe   | Ni   | Cu   | Zn   | As    | Co    |
| 0  | 0.496 | 746   | 0.735 | 11.4 | 1.59 | 0.981 | 35.8 | 10.9 | 1.84 | 394  | 696  | 2.01 | 21.7 | 95.1 | 0.488 | 0.408 |
| 1  | 0.12  | 119   | 0.11  | 3.31 | n.d. | 0.06  | 10.7 | 2.34 | 0.20 | 31.3 | 164  | 0.40 | 1.95 | 23.2 | 0.06  | 0.11  |
| 2  | 0.21  | 93.13 | 0.26  | 5.96 | 62.9 | 0.37  | 23.8 | 5.14 | 0.55 | 2.64 | 182  | 0.66 | 2.64 | 42.5 | 0.19  | 0.22  |
| 3  | 0.65  | 256   | 0.41  | 6.96 | n.d. | 0.41  | 8.40 | 8.05 | 0.93 | n.d. | 320  | 0.83 | 6.43 | 61.8 | 0.53  | 0.32  |
| 4  | 1.30  | 479   | 0.66  | 13.3 | n.d. | 0.67  | 12.9 | 13.3 | 1.70 | n.d. | 584  | 1.55 | 12.1 | 95.1 | 0.74  | 0.48  |
| 5  | 0.70  | 518   | 5.43  | 13.6 | n.d. | 0.82  | 15.1 | 17.0 | 1.59 | n.d. | 637  | 1.46 | 15.3 | 153  | 0.59  | 0.49  |
| 6  | 0.58  | 616   | 16.4  | 4.50 | n.d. | 0.71  | 21.8 | 14.8 | 1.18 | n.d. | 709  | 1.10 | 7.73 | 84.3 | 0.55  | 0.42  |
| 7  | 0.72  | 737   | 2.83  | 6.73 | 1.47 | 0.85  | 45.0 | 20.2 | 1.97 | n.d. | 989  | 1.50 | 8.98 | 95.7 | 0.58  | 0.57  |
| 8  | 1.07  | 857   | 18.0  | 15.4 | 2.82 | 0.79  | 103  | 19.6 | 2.05 | 50.5 | 1045 | 1.64 | 9.31 | 154  | 0.70  | 0.62  |
| 9  | 1.51  | 1313  | 4.07  | 27.1 | n.d. | 1.14  | 110  | 29.0 | 3.84 | n.d. | 1652 | 2.66 | 12.4 | 242  | 0.78  | 0.91  |
| 10 | 1.67  | 1629  | 1.63  | 26.9 | 0.02 | 1.13  | 125  | 30.2 | 3.40 | n.d. | 1907 | 2.79 | 14.9 | 278  | 0.73  | 1.02  |
| 11 | 2.25  | 1913  | 18.5  | 19.9 | n.d. | 1.00  | 130  | 30.9 | 3.81 | n.d. | 2119 | 2.72 | 14.4 | 288  | 0.79  | 0.98  |
| 12 | 1.44  | 1756  | 3.48  | 26.6 | n.d. | 1.15  | 50.1 | 30.6 | 3.57 | n.d. | 1911 | 2.77 | 16.7 | 249  | 0.76  | 1.09  |

n.d.: no data- no element was determined or its concentration was lower than that of the control sample marked '0'; consecutive numbers indicate consecutive

months of exposure; Pl, Sp, Di- selected moss species: *P. schreberi*, *S. fallax*, *D. polysetum*

**Table S2.** Average concentrations of PAHs in mosses during the one-year experiment- relative values [ng/g].

| Pl | Naphthalin | Acenaphthylene | Acenaphthen | Fluoren | Phenanthren | Pyren | Benzo(a)anthracen | Benzo(k)fluoranthene | Benzo(a)pyrene | Indeno(1,2,3-cd)pyren | Dibenzo(a,h)anthracen | Benzo(g,h,i)perylene | Anthracen | Fluoranthen | Chrysen | Benzo(b)fluoranthen |
|----|------------|----------------|-------------|---------|-------------|-------|-------------------|----------------------|----------------|-----------------------|-----------------------|----------------------|-----------|-------------|---------|---------------------|
| 0  | 20.8       | 0.01           | 0.01        | 0.039   | 55.9        | 23.4  | 0.039             | 4.84                 | 12.4           | 19.6                  | 17.6                  | 17.6                 | 9.64      | 37.1        | 17.1    | 4.03                |
| 1  | 6.01       | n.d.           | 0.179       | n.d.    | 31.1        | 63.7  | 4.54              | 4.14                 | 1.39           | 1.44                  | 3.92                  | 3.92                 | 3.11      | 88.6        | 24.8    | 9.60                |
| 2  | 15.0       | 2.50           | 0.078       | 8.19    | 254         | 236   | 21.3              | 17.4                 | 5.21           | 14.2                  | 12.3                  | 12.3                 | 11.3      | 358         | 79.8    | 39.0                |
| 3  | 12.7       | 3.40           | 4.76        | 10.3    | 219         | 289   | 35.3              | 28.1                 | 9.40           | 14.9                  | 15.8                  | 15.8                 | 18.1      | 434         | 112     | 44.6                |
| 4  | 9.76       | 1.88           | n.d.        | 8.12    | 275         | 460   | 46.0              | 48.7                 | 15.3           | 25.6                  | 24.4                  | 24.4                 | 15.9      | 731         | 164     | 70.4                |
| 5  | 13.6       | 12.2           | n.d.        | 20.5    | 612         | 595   | 36.1              | 57.2                 | 18.8           | 34.5                  | 28.8                  | 28.8                 | 18.0      | 1050        | 566     | 95.2                |
| 6  | 22.7       | 10.4           | 0.248       | 23.9    | 563         | 540   | 32.0              | 53.6                 | 19.0           | 31.0                  | 27.1                  | 27.1                 | 16.5      | 972         | 196     | 90.2                |
| 7  | 19.7       | 7.09           | n.d.        | 10.4    | 343         | 490   | 34.2              | 56.9                 | 19.3           | 28.8                  | 26.3                  | 26.3                 | 11.9      | 829         | 222     | 87.1                |
| 8  | n.d.       | 6.96           | n.d.        | 5.39    | 160         | 314   | 29.1              | 50.5                 | 23.0           | 25.3                  | 23.2                  | 23.2                 | 9.31      | 523         | 172     | 86.4                |
| 9  | 1.39       | 4.85           | 0.921       | 6.23    | 86.9        | 183   | 23.6              | 48.4                 | 23.2           | 26.0                  | 22.8                  | 22.8                 | 9.66      | 290         | 135     | 83.8                |
| 10 | 4.49       | 6.44           | 1.25        | 6.84    | 66.7        | 122   | 20.1              | 39.6                 | 22.0           | 23.8                  | 24.3                  | 24.3                 | 14.6      | 189         | 100     | 72.1                |
| 11 | 6.60       | 8.79           | 1.33        | 5.94    | 60.8        | 115   | 19.8              | 38.0                 | 20.7           | 20.8                  | 24.0                  | 24.0                 | 11.0      | 176         | 93.9    | 64.0                |
| 12 | 10.7       | 6.92           | 2.68        | 5.86    | 83.9        | 129   | 21.8              | 39.7                 | 21.6           | 19.6                  | 20.7                  | 20.7                 | 14.5      | 185         | 84.5    | 61.0                |
|    |            |                |             |         |             |       |                   |                      |                |                       |                       |                      |           |             |         |                     |
| Sp | Naphthalin | Acenaphthylene | Acenaphthen | Fluoren | Phenanthren | Pyren | Benzo(a)anthracen | Benzo(k)fluoranthene | Benzo(a)pyrene | Indeno(1,2,3-cd)pyren | Dibenzo(a,h)anthracen | Benzo(g,h,i)perylene | Anthracen | Fluoranthen | Chrysen | Benzo(b)fluoranthen |
| 0  | 43.6       | 33.7           | 4.98        | 20.5    | 110         | 67.0  | 8.96              | 9.50                 | 14.0           | 15.2                  | 7.24                  | 0.020                | 16.6      | 53.8        | 19.5    | 12.3                |
| 1  | n.d.       | n.d.           | n.d.        | n.d.    | 41.0        | 64.6  | 2.80              | 3.89                 | n.d.           | 2.31                  | 4.89                  | 14.3                 | 0.055     | 124         | 21.5    | 3.27                |
| 2  | 8.03       | n.d.           | 3.66        | 8.76    | 323         | 257   | 15.6              | 14.1                 | 3.42           | 7.94                  | 2.69                  | 24.0                 | 7.84      | 423         | 61.7    | 21.8                |
| 3  | n.d.       | n.d.           | 3.25        | n.d.    | 202         | 272   | 24.7              | 24.6                 | 6.23           | 16.3                  | 3.24                  | 30.2                 | 6.73      | 465         | 85.6    | 33.4                |

|    |            |                |             |         |             |       |                   |                      |                |                       |                       |                      |           |             |         |                     |
|----|------------|----------------|-------------|---------|-------------|-------|-------------------|----------------------|----------------|-----------------------|-----------------------|----------------------|-----------|-------------|---------|---------------------|
| 4  | n.d.       | n.d.           | n.d.        | 7.09    | 402         | 513   | 35.0              | 21.4                 | 66.3           | 28.7                  | 1.65                  | 36.8                 | 11.6      | 906         | 149     | 71.7                |
| 5  | n.d.       | n.d.           | n.d.        | n.d.    | 432         | 268   | 10.3              | 20.7                 | 3.18           | 9.76                  | 1.82                  | 21.8                 | n.d.      | 552         | 69.4    | 30.3                |
| 6  | n.d.       | n.d.           | n.d.        | 5.18    | 581         | 467   | 23.6              | 57.0                 | 14.7           | 27.0                  | 1.90                  | 36.5                 | 1.26      | 947         | 130     | 66.1                |
| 7  | n.d.       | n.d.           | n.d.        | 3.23    | 318         | 424   | 27.4              | 51.6                 | 17.0           | 33.5                  | 2.17                  | 41.2                 | 1.67      | 884         | 184     | 84.7                |
| 8  | n.d.       | n.d.           | n.d.        | n.d.    | 83.5        | 238   | 15.5              | 32.9                 | 13.8           | 21.1                  | 3.10                  | 29.8                 | 0.407     | 518         | 110     | 53.2                |
| 9  | n.d.       | n.d.           | n.d.        | n.d.    | n.d.        | 98.1  | 11.6              | 30.1                 | 14.3           | 20.8                  | 0.216                 | 30.8                 | n.d.      | 244         | 78.5    | 50.6                |
| 10 | n.d.       | n.d.           | n.d.        | 15.5    | n.d.        | 48.8  | 9.41              | 19.6                 | 11.3           | 10.2                  | 2.08                  | 23.1                 | n.d.      | 159         | 43.2    | 29.0                |
|    |            |                |             |         |             |       |                   |                      |                |                       |                       |                      |           |             |         |                     |
| Di | Naphthalin | Acenaphthylene | Acenaphthen | Fluoren | Phenanthren | Pyren | Benzo(a)anthracen | Benzo(k)fluoranthene | Benzo(a)pyrene | Indeno(1,2,3-cd)pyren | Dibenzo(a,h)anthracen | Benzo(g,h,i)perylene | Anthracen | Fluoranthen | Chrysen | Benzo(b)fluoranthen |
| 0  | 604        | 432            | 77.8        | 351     | 1072        | 557   | 89.2              | 46.2                 | 63.3           | 68.7                  | 33.3                  | 118                  | 47.1      | 361         | 121     | 109                 |
| 1  | 542        | n.d.           | n.d.        | n.d.    | n.d.        | n.d.  | n.d.              | 8.37                 | n.d.           | n.d.                  | 18.1                  | n.d.                 | n.d.      | n.d.        | n.d.    | n.d.                |
| 2  | 40.4       | n.d.           | n.d.        | n.d.    | n.d.        | n.d.  | n.d.              | 2.59                 | n.d.           | n.d.                  | 19.5                  | n.d.                 | n.d.      | 199         | 17.8    | n.d.                |
| 3  | n.d.       | n.d.           | n.d.        | n.d.    | n.d.        | n.d.  | n.d.              | 1.15                 | n.d.           | n.d.                  | 9.87                  | n.d.                 | n.d.      | 224         | 8.57    | n.d.                |
| 4  | n.d.       | n.d.           | n.d.        | n.d.    | n.d.        | 248   | n.d.              | 30.9                 | n.d.           | n.d.                  | 36.3                  | n.d.                 | n.d.      | 853         | 105     | n.d.                |
| 5  | n.d.       | n.d.           | n.d.        | n.d.    | 353         | 328   | n.d.              | 26.9                 | n.d.           | n.d.                  | 21.9                  | n.d.                 | n.d.      | 1062        | 137     | n.d.                |
| 6  | 252        | n.d.           | n.d.        | n.d.    | 590         | 474   | 14.3              | 62.7                 | n.d.           | 0.960                 | 11.7                  | n.d.                 | 8.46      | 1092        | 176     | 28.5                |
| 7  | n.d.       | n.d.           | n.d.        | n.d.    | n.d.        | 26.1  | n.d.              | 12.0                 | n.d.           | n.d.                  | n.d.                  | n.d.                 | n.d.      | 546         | 90.3    | n.d.                |
| 8  | n.d.       | n.d.           | n.d.        | n.d.    | n.d.        | n.d.  | n.d.              | 6.19                 | n.d.           | n.d.                  | n.d.                  | n.d.                 | n.d.      | 164         | 29.5    | n.d.                |
| 9  | n.d.       | n.d.           | n.d.        | n.d.    | n.d.        | n.d.  | n.d.              | 0.19                 | n.d.           | n.d.                  | n.d.                  | n.d.                 | n.d.      | 19.6        | 17.6    | n.d.                |
| 10 | n.d.       | n.d.           | n.d.        | n.d.    | n.d.        | n.d.  | n.d.              | n.d.                 | n.d.           | n.d.                  | n.d.                  | n.d.                 | n.d.      | n.d.        | n.d.    | n.d.                |
| 11 | n.d.       | n.d.           | n.d.        | n.d.    | n.d.        | n.d.  | n.d.              | n.d.                 | n.d.           | n.d.                  | n.d.                  | n.d.                 | n.d.      | n.d.        | n.d.    | n.d.                |
| 12 | n.d.       | n.d.           | n.d.        | n.d.    | n.d.        | n.d.  | n.d.              | n.d.                 | n.d.           | n.d.                  | n.d.                  | n.d.                 | n.d.      | n.d.        | n.d.    | n.d.                |

n.d.: no data- no PAH was determined or its concentration was lower than that of the control sample marked '0'; consecutive numbers indicate consecutive

months of exposure; Pl, Sp, Di- selected moss species: *P. schreberi*, *S. fallax*, *D. polysetum*
